# Supplementary material for: Applying Nonparametric Methods to Analyses of Short-Term Fine Particulate Matter Exposure and Hospital Admissions for Cardiovascular Diseases among Older Adults
Source: MDPI journal article supplement (doi:10.3390/ijerph14091051), 2017-09-12
Supplement: s1 [file s1]

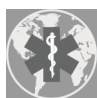

Article

# Applying Nonparametric Methods to Analyses of Short-term Fine Particulate Matter Exposure and Hospital Admissions for Cardiovascular Diseases among Older Adults

Louis Anthony (Tony) Cox, Jr. <sup>1</sup>, Xiaobin Liu <sup>2</sup>, Liuhua Shi <sup>2</sup>, Ke Zu <sup>2</sup>, and Julie Goodman <sup>2,\*</sup>

<sup>1</sup> Cox Associates Consulting; tcoxdenver@aol.com

<sup>2</sup> Gradient; xliu@gradientcorp.com

Gradient; LShi@gradientcorp.com

Gradient; kzu@gradientcorp.com

Gradient; jgoodman@gradientcorp.com

\* Correspondence: jgoodman@gradientcorp.com; Tel.: +1-617-395-5525

## Supplementary Material

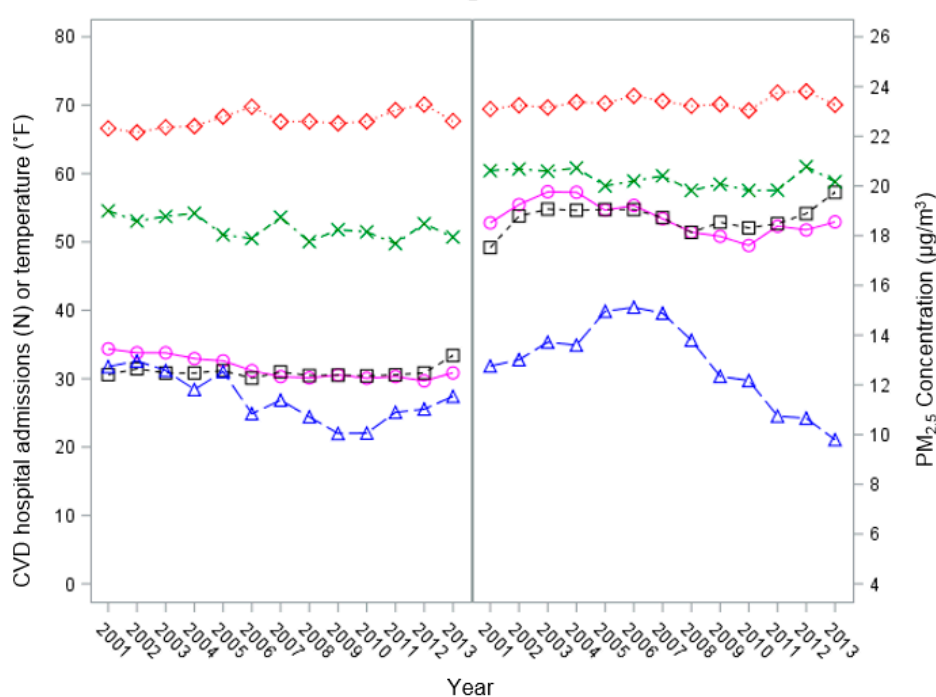

**Figure S1.** Annual average PM<sub>2.5</sub> concentrations, mean temperature, dew point, and daily CVD HAS for adult men and women (aged 18 years and over) in Dallas County (left) and Harris County (right), Texas, 2001-2013. Circles represent CVD HAS for women; squares represent CVD HAS for men; triangles represent daily PM<sub>2.5</sub> concentrations; diamonds represent daily average temperature; crosses represent dew point.

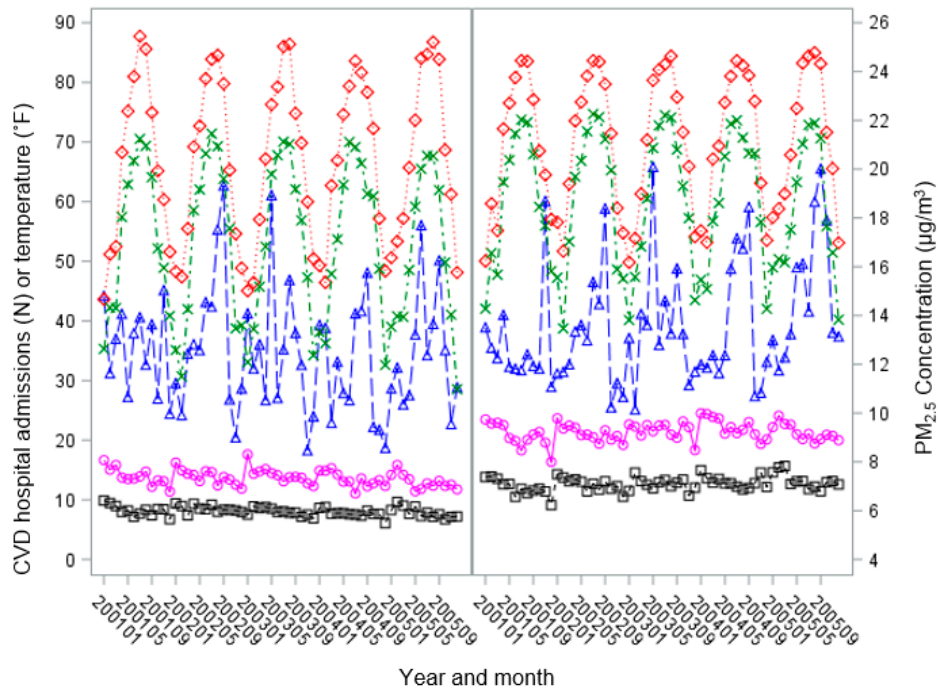

**Figure S2.** Monthly average PM<sub>2.5</sub> concentrations, mean temperature, dew point, and daily CVD HAS for men and women (aged 75 years and over) in Dallas County (left) and Harris County (right), Texas, 2001-2005. Circles represent CVD HAS for women; squares represent CVD HAS for men; triangles represent daily PM<sub>2.5</sub> concentrations; diamonds represent daily average temperature; crosses represent dew point.

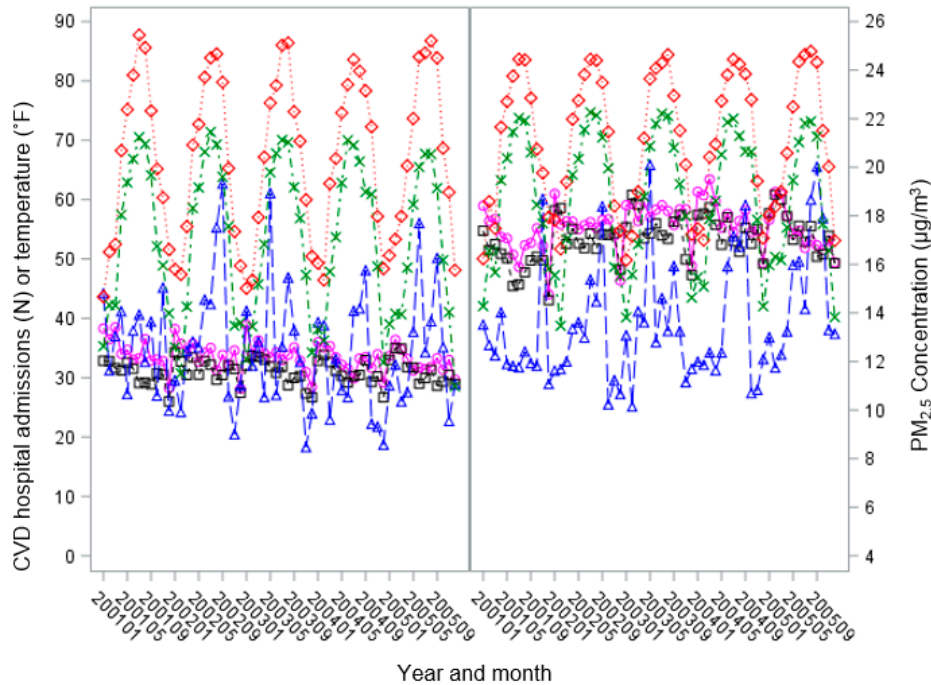

**Figure S3.** Monthly average PM<sub>2.5</sub> concentrations, mean temperature, dew point, and daily CVD HAS for adult men and women (aged 18 years and over) in Dallas County (left) and Harris County (right), Texas, 2001-2005. Circles represent CVD HAS for women; squares represent CVD HAS for men; triangles represent daily PM<sub>2.5</sub> concentrations; diamonds represent daily average temperature; crosses represent dew point.

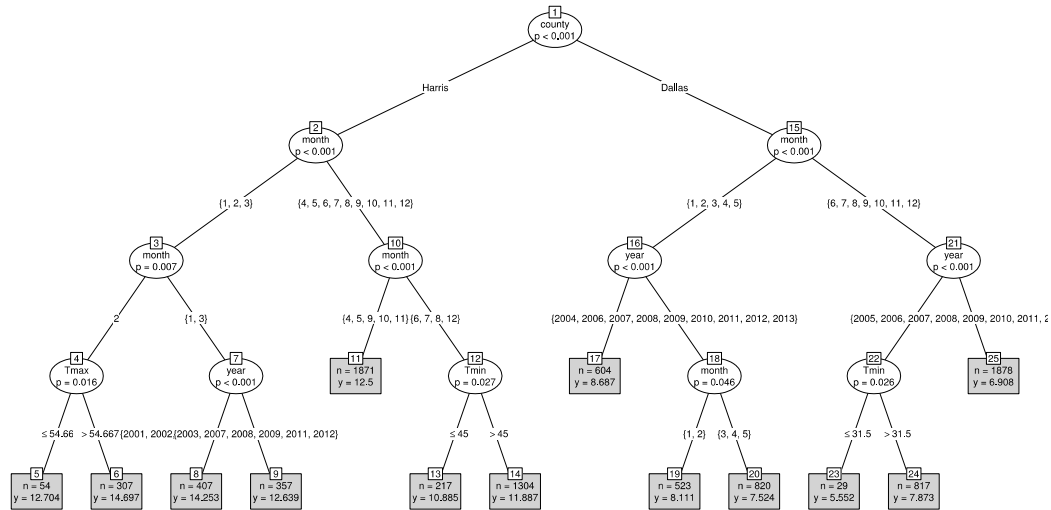

**Figure S4.** Regression tree for CVD HAS among men 75 years of age and older. The variables chosen by the tree-growing algorithm are identified as informative for predicting CVD HAS among older men. The intermediate nodes show the p-values from F tests for rejecting the null hypothesis that the conditional distributions are not different from each other on the left and right of each split. Each shaded "leaf" node at the bottom of the tree shows the conditional mean value of the dependent variable, given the ranges of values for the variables in the path leading to that leaf.

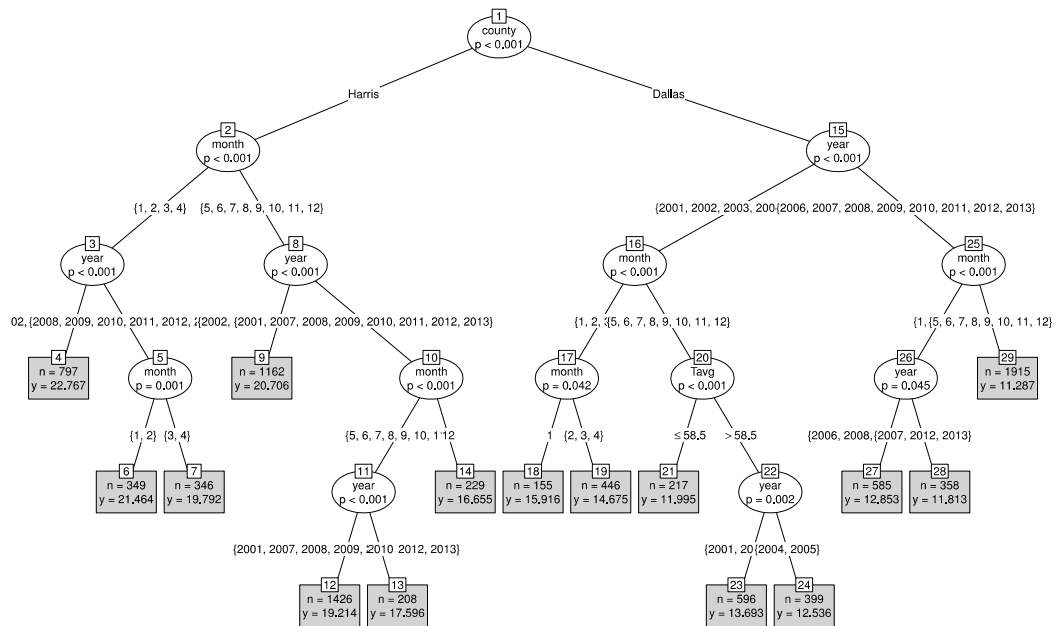

**Figure S5.** Regression tree for CVD HAS among women 75 years of age and older. The variables chosen by the tree-growing algorithm are identified as informative for predicting CVD HAS among older women. The intermediate nodes show the p-values from F tests for rejecting the null hypothesis that the conditional distributions are not different from each other on the left and right of each split. Each shaded "leaf" node at the bottom of the tree shows the conditional mean value of the dependent variable, given the ranges of values for the variables in the path leading to that leaf.

**Table S1.** County-specific daily CVD HAs, ambient PM<sub>2.5</sub> concentrations, and meteorological factors in Dallas and Harris counties, Texas, from 2001 to 2013

|                                                                    | Days with Data | Mean | SD   | Minimum | 10th Percentile | 25th Percentile | Median | 75th Percentile | 90th Percentile | Maximum | Total   |
|--------------------------------------------------------------------|----------------|------|------|---------|-----------------|-----------------|--------|-----------------|-----------------|---------|---------|
| Dallas County                                                      |                |      |      |         |                 |                 |        |                 |                 |         |         |
| CVD HAs (N)                                                        |                |      |      |         |                 |                 |        |                 |                 |         |         |
| All, 18 to 75 years                                                | 4671           | 42.5 | 9.4  | 6.0     | 31.0            | 36.0            | 43.0   | 49.0            | 55.0            | 76.0    | 198,675 |
| All, 75+ years                                                     | 4671           | 20.0 | 5.7  | 0.0     | 13.0            | 16.0            | 20.0   | 24.0            | 27.0            | 42.0    | 93,366  |
| Women, 18+ years                                                   | 4671           | 31.6 | 7.7  | 2.0     | 22.0            | 26.0            | 31.0   | 37.0            | 41.0            | 63.0    | 147,551 |
| Men, 18+ years                                                     | 4671           | 30.9 | 7.5  | 2.0     | 21.0            | 26.0            | 31.0   | 36.0            | 41.0            | 58.0    | 144,484 |
| Women, 75+ years                                                   | 4671           | 12.4 | 4.1  | 0.0     | 7.0             | 10.0            | 12.0   | 15.0            | 18.0            | 31.0    | 58,140  |
| Men, 75+ years                                                     | 4671           | 7.5  | 3.1  | 0.0     | 4.0             | 5.0             | 7.0    | 10.0            | 12.0            | 22.0    | 35,225  |
| PM <sub>2.5</sub> and Meteorological Factors                       |                |      |      |         |                 |                 |        |                 |                 |         |         |
| Daily Average PM <sub>2.5</sub> Concentration (µg/m <sup>3</sup> ) | 4671           | 11.5 | 5.4  | 1.6     | 5.8             | 7.7             | 10.5   | 14.2            | 18.4            | 51.2    |         |
| Daily Average Temperature (°F)                                     | 4671           | 67.8 | 16.0 | 18.0    | 45.5            | 55.5            | 69.5   | 81.5            | 87.0            | 100.0   |         |
| Daily Minimum Temperature (°F)                                     | 4671           | 57.5 | 16.1 | 12.0    | 34.5            | 44.0            | 59.5   | 72.0            | 77.0            | 88.0    |         |
| Daily Maximum Temperature (°F)                                     | 4671           | 77.7 | 16.4 | 21.5    | 54.0            | 66.5            | 79.5   | 91.0            | 97.5            | 111.0   |         |
| Daily Dew Point Temperature (°F)                                   | 4671           | 52.1 | 15.8 | 5.5     | 29.0            | 39.5            | 56.0   | 66.0            | 69.5            | 74.5    |         |
| Harris County                                                      |                |      |      |         |                 |                 |        |                 |                 |         |         |
| CVD HAs (N)                                                        |                |      |      |         |                 |                 |        |                 |                 |         |         |
| All, 18 to 75 years                                                | 4517           | 74.2 | 16.0 | 6.0     | 53.0            | 63.0            | 75.0   | 86.0            | 94.0            | 124.0   | 335,334 |
| All, 75+ years                                                     | 4517           | 32.8 | 8.0  | 1.0     | 23.0            | 27.0            | 33.0   | 38.0            | 43.0            | 59.0    | 148,201 |
| Women, 18+ years                                                   | 4517           | 53.5 | 11.7 | 4.0     | 39.0            | 45.0            | 54.0   | 62.0            | 68.0            | 93.0    | 241,521 |
| Men, 18+ years                                                     | 4517           | 53.6 | 12.3 | 4.0     | 38.0            | 45.0            | 54.0   | 62.0            | 69.0            | 93.0    | 241,931 |
| Women, 75+ years                                                   | 4517           | 20.2 | 5.6  | 1.0     | 13.0            | 16.0            | 20.0   | 24.0            | 28.0            | 43.0    | 91,417  |
| Men, 75+ years                                                     | 4517           | 12.6 | 4.3  | 0.0     | 7.0             | 9.0             | 12.0   | 15.0            | 18.0            | 28.0    | 56,762  |

|                                                                    | Days with Data | Mean | SD   | Minimum | 10th Percentile | 25th Percentile | Median | 75th Percentile | 90th Percentile | Maximum | Total |
|--------------------------------------------------------------------|----------------|------|------|---------|-----------------|-----------------|--------|-----------------|-----------------|---------|-------|
| PM <sub>2.5</sub> and Meteorological Factors                       |                |      |      |         |                 |                 |        |                 |                 |         |       |
| Daily Average PM <sub>2.5</sub> Concentration (µg/m <sup>3</sup> ) | 4517           | 12.9 | 5.6  | 0.6     | 6.7             | 8.9             | 11.9   | 15.7            | 20.2            | 57.5    |       |
| Daily Average Temperature (°F)                                     | 4517           | 70.4 | 13.2 | 27.7    | 50.7            | 60.7            | 73.0   | 82.0            | 85.3            | 92.3    |       |
| Daily Minimum Temperature (°F)                                     | 4517           | 60.4 | 14.0 | 19.0    | 39.3            | 49.0            | 63.7   | 73.0            | 75.7            | 81.3    |       |
| Daily Maximum Temperature (°F)                                     | 4517           | 80.0 | 13.1 | 31.7    | 61.0            | 71.7            | 82.0   | 90.7            | 94.7            | 106.0   |       |
| Daily Dew Point Temperature (°F)                                   | 4517           | 59.2 | 14.2 | 10.7    | 37.0            | 49.3            | 63.7   | 71.3            | 74.0            | 77.3    |       |

CVD = cardiovascular disease; HA = hospital admission; PM<sub>2.5</sub> = fine particulate matter; SD = standard deviation; µg/m<sup>3</sup> = microgram per cubic meter.
